# Supplementary material
Source: publisher figshare collection journal article supplement (https://tandf.figshare.com/ndownloader/files/31583662)
Supplement: Supplementary file 1 [file 31583662]

## Appendix

### Study One Experimental Conditions

#### *Control condition*

Next, we will ask you several questions about your opinions on various topics. Please read each question carefully.

#### *Scientific report*

New Federal Climate Assessment Report

Released November, 2018

The Fourth National Climate Assessment Report, which is mandated by Congress, was released in November 2018. The scientific consensus report predicts that climate change will cause hundreds of billions of dollars in damages by the end of this century. Rising temperatures and extreme heat will cause severe droughts and wildfires throughout the country. This will degrade air quality, decrease crop yields for farmers, and reduce the amount of fresh water available in many places. The report also predicts that climate change will cause the level of the ocean to rise, flooding many coastal areas in the US. Many people who live in flood-prone locations will have to leave their homes. Storm surges that happen because of more intense hurricanes will cause salt-water intrusion, contaminating drinking water and destroying property and ecosystems in the Atlantic and Gulf coasts.

#### *Scientific report attributed to President Trump*

Trump Releases Federal Climate Assessment

Report November, 2018

The Fourth National Climate Assessment Report, which is mandated by Congress, was released by President Trump's White House Office of Science and Technology in November 2018. The scientific consensus report predicts that climate change will cause hundreds of billions of dollars in damages by the end of this century. Rising temperatures and extreme heat will cause severe droughts and wildfires throughout the country. This will degrade air quality, decrease crop yields for farmers, and reduce the amount of fresh water available in many places. The report also predicts that climate change will cause the level of the ocean to rise, flooding many coastal areas in the US. Many people who live in flood-prone locations will have to leave their homes. Storm surges that happen because of more intense hurricanes will cause salt-water intrusion, contaminating drinking water and destroying property and ecosystems in the Atlantic and Gulf coasts.

#### *Conspiracy frame*

Global Warming: Fake Science Again Serves Far-Left Political Agenda

November, 2018

The Fourth National Climate Assessment Report, which is mandated by Congress, was released in November 2018. The scientific "consensus" report predicts that climate change will cause hundreds of billions of dollars in damages by the end of this century. Skeptics of the report dismissed the findings as "fake science" being promoted by the left-wing media as a way to scare people into supporting a radical "political agenda." The conclusions of the report are said to "border on the absurd" and that the models on which they base their conclusions are supported by socialist bureaucrats whose goals are to justify sweeping changes in lifestyle and the global economy.

### ***Conspiracy frame attributed to President Trump***

Trump Argues Fake Science Again Serves Far-Left Political Agenda

November, 2018

The Fourth National Climate Assessment Report, which is mandated by Congress, was released in November 2018. The scientific “consensus” report predicts that climate change will cause hundreds of billions of dollars in damages by the end of this century. President Trump called the report’s findings “fake science” being promoted by the left-wing media as a way to scare people into supporting a radical “political agenda.” The President argued the report’s findings “border on the absurd” and that the models on which they base their conclusions are supported by socialist bureaucrats whose goals are to justify sweeping changes in lifestyle and the global economy.

### ***Combination of scientific report and conspiracy frame***

Debated Federal Climate Assessment Report Released

November, 2018

The Fourth National Climate Assessment Report, which is mandated by Congress, was released in November 2018. The scientific consensus report predicts that climate change will cause hundreds of billions of dollars in damages by the end of this century. Rising temperatures and extreme heat will cause severe droughts and wildfires throughout the country. This will degrade air quality, decrease crop yields for farmers, and reduce the amount of fresh water available in many places. The report also predicts that climate change will cause the level of the ocean to rise, flooding many coastal areas in the US. Many people who live in flood-prone locations will have to leave their homes. Storm surges that happen because of more intense hurricanes will cause salt-water intrusion, contaminating drinking water and destroying property and ecosystems in the Atlantic and Gulf coasts. Skeptics of the report dismissed the findings as “fake science” being promoted by the left-wing media as a way to scare people into supporting a radical “political agenda.” The conclusions of the report are said to “border on the absurd” and that the models on which they base their conclusions are supported by socialist bureaucrats whose goals are to justify sweeping changes in lifestyle and the global economy.

### ***Combination of scientific report and conspiracy frame attributed to President Trump***

Debated Federal Climate Assessment Report Released

November, 2018

The Fourth National Climate Assessment Report, which is mandated by Congress, was released in November 2018. The scientific consensus report predicts that climate change will cause hundreds of billions of dollars in damages by the end of this century. Rising temperatures and extreme heat will cause severe droughts and wildfires throughout the country. This will degrade air quality, decrease crop yields for farmers, and reduce the amount of fresh water available in many places. The report also predicts that climate change will cause the level of the ocean to rise, flooding many coastal areas in the US. Many people who live in flood-prone locations will have to leave their homes. Storm surges that happen because of more intense hurricanes will cause salt-water intrusion, contaminating drinking water and destroying property and ecosystems in the Atlantic and Gulf coasts. President Trump called the report’s findings “fake science” being promoted by the left-wing media as a way to scare people into supporting a radical “political agenda.” The President argued the report’s findings “border on the absurd” and that the models on which they base their conclusions are supported by socialist bureaucrats whose goals are to justify sweeping changes in lifestyle and the global economy.

## Demographics

**Table A1 - Sample Demographics (Study 1)**

| Variable              | Frequency (%) |
|-----------------------|---------------|
| Age                   |               |
| 18 - 24               | 175 (5.9%)    |
| 25 - 34               | 409 (13.8%)   |
| 35 - 44               | 424 (14.3%)   |
| 45 - 54               | 436 (14.7%)   |
| 55 - 64               | 692 (23.3%)   |
| 65 - 74               | 685 (23.0%)   |
| 75 - 84               | 148 (5.0%)    |
| 85 or older           | 4 (0.1%)      |
| Female                |               |
| Male                  | 1,463 (49.2%) |
| Female                | 1,510 (50.8%) |
| Race                  |               |
| White                 | 2,067 (69.5%) |
| African American      | 312 (10.5%)   |
| Asian American        | 142 (4.8%)    |
| Hispanic              | 310 (10.4%)   |
| Other                 | 142 (4.8%)    |
| Education             |               |
| Less than high school | 91 (3.1%)     |
| High school graduate  | 664 (22.3%)   |
| Some college          | 790 (26.6%)   |
| 2 year degree         | 355 (11.9%)   |
| 4 year degree         | 721 (24.3%)   |
| Professional degree   | 304 (10.2%)   |
| Doctorate             | 48 (1.6%)     |
| Income                |               |
| Less than \$10,000    | 217 (7.3%)    |
| \$10,000 - \$19,999   | 377 (12.7%)   |
| \$20,000 - \$29,999   | 363 (12.2%)   |
| \$30,000 - \$39,999   | 368 (12.4%)   |
| \$40,000 - \$49,999   | 293 (9.9%)    |
| \$50,000 - \$59,999   | 303 (10.2%)   |
| \$60,000 - \$69,999   | 203 (6.8%)    |
| \$70,000 - \$79,999   | 200 (6.7%)    |
| \$80,000 - \$89,999   | 118 (4.0%)    |
| \$90,000 - \$99,999   | 133 (4.5%)    |
| \$100,000 - \$149,999 | 257 (8.6%)    |
| More than \$150,000   | 141 (4.7%)    |
| Party ID              |               |
| Republican            | 986 (33.2%)   |
| Independent           | 987 (33.2%)   |
| Democrat              | 1,000 (33.6%) |
| Total                 | N=2,973       |

## Main Effects Tables – Study 1

**Table A2: Perceived Negative Effects of Climate Change**

|                                     | All               | Rep               | Ind               | Dem               |
|-------------------------------------|-------------------|-------------------|-------------------|-------------------|
| Conspiracy                          | 0.05<br>(0.12)    | 0.26<br>(0.17)    | -0.05<br>(0.19)   | -0.05<br>(0.23)   |
| Conspiracy Trump Source             | -0.03<br>(0.11)   | 0.14<br>(0.17)    | -0.01<br>(0.19)   | -0.19<br>(0.24)   |
| Scientific Report                   | 0.20*<br>(0.12)   | 0.34**<br>(0.16)  | 0.20<br>(0.20)    | 0.12<br>(0.23)    |
| Scientific Report Trump Source      | 0.20*<br>(0.12)   | 0.23<br>(0.17)    | 0.21<br>(0.19)    | 0.20<br>(0.24)    |
| Conspiracy & Scientific Report      | 0.31***<br>(0.12) | 0.37**<br>(0.16)  | 0.18<br>(0.20)    | 0.40*<br>(0.23)   |
| Conspiracy Trump Src. & Sci. Report | 0.23**<br>(0.12)  | 0.46***<br>(0.17) | -0.10<br>(0.19)   | 0.37<br>(0.24)    |
| Constant (Control Group)            | 4.55***<br>(0.08) | 4.27***<br>(0.12) | 4.65***<br>(0.13) | 4.69***<br>(0.17) |
| Observations                        | 2973              | 986               | 987               | 1000              |
| <i>AIC</i>                          | 11618.8           | 3440.7            | 3837.6            | 4215.6            |
| <i>BIC</i>                          | 11660.8           | 3475.0            | 3871.9            | 4249.9            |

Note: Cell entries are OLS coefficients, with standard errors in parentheses below.

\* p<0.10, \*\* p<0.05, \*\*\* p<0.01

**Table A3: Perceived Risks of Climate Change**

|                                     | All               | Rep               | Ind               | Dem               |
|-------------------------------------|-------------------|-------------------|-------------------|-------------------|
| Conspiracy                          | 0.01<br>(0.11)    | -0.12<br>(0.20)   | 0.09<br>(0.17)    | -0.03<br>(0.11)   |
| Conspiracy Trump Source             | -0.07<br>(0.11)   | -0.45**<br>(0.20) | 0.18<br>(0.16)    | 0.09<br>(0.11)    |
| Scientific Report                   | -0.07<br>(0.11)   | -0.21<br>(0.19)   | 0.09<br>(0.17)    | 0.03<br>(0.11)    |
| Scientific Report Trump Source      | -0.01<br>(0.11)   | -0.02<br>(0.20)   | -0.16<br>(0.17)   | 0.20*<br>(0.11)   |
| Conspiracy & Scientific Report      | 0.08<br>(0.11)    | -0.10<br>(0.19)   | 0.36**<br>(0.17)  | 0.02<br>(0.11)    |
| Conspiracy Trump Src. & Sci. Report | -0.05<br>(0.11)   | -0.09<br>(0.20)   | -0.06<br>(0.17)   | 0.02<br>(0.11)    |
| Constant (Control Group)            | 5.15***<br>(0.07) | 4.36***<br>(0.14) | 5.09***<br>(0.11) | 5.97***<br>(0.08) |
| Observations                        | 2973              | 986               | 987               | 1000              |
| <i>AIC</i>                          | 11117.1           | 3772.0            | 3575.0            | 2748.8            |
| <i>BIC</i>                          | 11159.1           | 3806.3            | 3609.3            | 2783.2            |

Note: Cell entries are OLS coefficients, with standard errors in parentheses below.

\* p<0.10, \*\* p<0.05, \*\*\* p<0.01

**Table A4: Beliefs that Climate Change is a Hoax**

|                                     | All               | Rep               | Ind               | Dem               |
|-------------------------------------|-------------------|-------------------|-------------------|-------------------|
| Conspiracy                          | 0.04<br>(0.14)    | 0.29<br>(0.24)    | -0.16<br>(0.22)   | 0.07<br>(0.19)    |
| Conspiracy Trump Source             | -0.01<br>(0.13)   | 0.29<br>(0.24)    | -0.20<br>(0.21)   | -0.15<br>(0.19)   |
| Scientific Report                   | 0.04<br>(0.13)    | 0.29<br>(0.23)    | -0.23<br>(0.22)   | -0.10<br>(0.19)   |
| Scientific Report Trump Source      | 0.16<br>(0.13)    | 0.08<br>(0.24)    | 0.21<br>(0.21)    | 0.13<br>(0.19)    |
| Conspiracy & Scientific Report      | -0.10<br>(0.13)   | 0.02<br>(0.24)    | -0.34<br>(0.22)   | -0.03<br>(0.19)   |
| Conspiracy Trump Src. & Sci. Report | -0.05<br>(0.14)   | -0.00<br>(0.24)   | -0.07<br>(0.22)   | -0.10<br>(0.19)   |
| Constant (Control Group)            | 3.00***<br>(0.09) | 3.85***<br>(0.17) | 3.05***<br>(0.14) | 2.12***<br>(0.13) |
| Observations                        | 2973              | 986               | 987               | 1000              |
| <i>AIC</i>                          | 12536.7           | 4166.3            | 4067.3            | 3783.3            |
| <i>BIC</i>                          | 12578.7           | 4200.6            | 4101.6            | 3817.7            |

Note: Cell entries are OLS coefficients, with standard errors in parentheses below.

\* p<0.10, \*\* p<0.05, \*\*\* p<0.01

## Appendix A5 – Test of Source Effects

### Conspiracy No Source vs Conspiracy With Trump Source

|                        | Consp. No Src.<br>Mean | Consp. &<br>Trump Src.<br>Mean | Diff. | <i>p</i> -value |
|------------------------|------------------------|--------------------------------|-------|-----------------|
| Scaled Effects Battery | 4.59                   | 4.52                           | 0.07  | 0.540           |
| Risk Scale             | 5.16                   | 5.08                           | 0.08  | 0.475           |
| Hoax                   | 3.03                   | 2.99                           | 0.04  | 0.754           |
| Observations           | 838                    |                                |       |                 |

Note: The first column contains the Conspiracy No Source condition mean for each of the three dependent variables; The second column contains the mean for the Conspiracy & Trump Source condition; The third column contains the difference in means between the conditions, with the *p*-value for each test presented in fourth column.

### Conspiracy No Source vs Conspiracy With Trump Source - Republicans

|                        | Consp. No Src.<br>Mean | Consp. &<br>Trump Src.<br>Mean | Diff. | <i>p</i> -value |
|------------------------|------------------------|--------------------------------|-------|-----------------|
| Scaled Effects Battery | 4.53                   | 4.41                           | 0.12  | 0.460           |
| Risk Scale             | 4.24                   | 3.91                           | 0.33  | 0.106           |
| Hoax                   | 4.14                   | 4.14                           | 0.00  | 0.991           |
| Observations           | 268                    |                                |       |                 |

Note: The first column contains the Conspiracy No Source condition mean for each of the three dependent variables; The second column contains the mean for the Conspiracy & Trump Source condition; The third column contains the difference in means between the conditions, with the *p*-value for each test presented in fourth column.

### Conspiracy No Source vs Conspiracy With Trump Source - Independents

|                        | Consp. No Src.<br>Mean | Consp. &<br>Trump Src.<br>Mean | Diff. | <i>p</i> -value |
|------------------------|------------------------|--------------------------------|-------|-----------------|
| Scaled Effects Battery | 4.60                   | 4.65                           | -0.04 | 0.822           |
| Risk Scale             | 5.18                   | 5.27                           | -0.09 | 0.589           |
| Hoax                   | 2.88                   | 2.84                           | 0.04  | 0.855           |
| Observations           | 287                    |                                |       |                 |

Note: The first column contains the Conspiracy No Source condition mean for each of the three dependent variables; The second column contains the mean for the Conspiracy & Trump Source condition; The third column contains the difference in means between the conditions, with the *p*-value for each test presented in fourth column.

### Conspiracy No Source vs Conspiracy With Trump Source - Democrats

|                        | Consp. No Src.<br>Mean | Consp. &<br>Trump Src.<br>Mean | Diff. | <i>p</i> -value |
|------------------------|------------------------|--------------------------------|-------|-----------------|
| Scaled Effects Battery | 4.64                   | 4.50                           | 0.14  | 0.550           |
| Risk Scale             | 5.94                   | 6.06                           | -0.12 | 0.310           |
| Hoax                   | 2.20                   | 1.98                           | 0.22  | 0.243           |
| Observations           | 283                    |                                |       |                 |

Note: The first column contains the Conspiracy No Source condition mean for each of the three dependent variables; The second column contains the mean for the Conspiracy & Trump Source condition; The third column contains the difference in means between the conditions, with the *p*-value for each test presented in fourth column.

#### Sci. Rprt. No Source vs Sci. Rprt. With Trump Source

|                        | Sci. Rprt. No<br>Src. Mean | Sci. Rprt. &<br>Trump Src.<br>Mean | Diff. | <i>p</i> -value |
|------------------------|----------------------------|------------------------------------|-------|-----------------|
| Scaled Effects Battery | 4.75                       | 4.75                               | -0.01 | 0.955           |
| Risk Scale             | 5.08                       | 5.14                               | -0.06 | 0.592           |
| Hoax                   | 3.03                       | 3.15                               | -0.12 | 0.388           |
| Observations           | 844                        |                                    |       |                 |

Note: The first column contains the Scientific Report No Source condition mean for each of the three dependent variables; The second column contains the mean for the Scientific Report & Trump Source condition; The third column contains the difference in means between the conditions, with the *p*-value for each test presented in fourth column.

#### Sci. Rprt. No Source vs Sci. Rprt. With Trump Source - Republicans

|                        | Sci. Rprt. No<br>Src. Mean | Sci. Rprt. &<br>Trump Src.<br>Mean | Diff. | <i>p</i> -value |
|------------------------|----------------------------|------------------------------------|-------|-----------------|
| Scaled Effects Battery | 4.61                       | 4.50                               | 0.11  | 0.484           |
| Risk Scale             | 4.15                       | 4.34                               | -0.19 | 0.300           |
| Hoax                   | 4.14                       | 3.93                               | 0.21  | 0.353           |
| Observations           | 296                        |                                    |       |                 |

Note: The first column contains the Scientific Report No Source condition mean for each of the three dependent variables; The second column contains the mean for the Scientific Report & Trump Source condition; The third column contains the difference in means between the conditions, with the *p*-value for each test presented in fourth column.

#### Sci. Rprt. No Source vs Sci. Rprt. With Trump Source - Independents

|                        | Sci. Rprt. No<br>Src. Mean | Sci. Rprt. &<br>Trump Src.<br>Mean | Diff. | <i>p</i> -value |
|------------------------|----------------------------|------------------------------------|-------|-----------------|
| Scaled Effects Battery | 4.85                       | 4.86                               | -0.01 | 0.943           |
| Risk Scale             | 5.18                       | 4.93                               | 0.25  | 0.180           |
| Hoax                   | 2.82                       | 3.26                               | -0.44 | 0.077           |
| Observations           | 266                        |                                    |       |                 |

Note: The first column contains the Scientific Report No Source condition mean for each of the three dependent variables; The second column contains the mean for the Scientific Report & Trump Source condition; The third column contains the difference in means between the conditions, with the *p*-value for each test presented in fourth column.

#### Sci. Rprt. No Source vs Sci. Rprt. With Trump Source - Democrats

|                        | Sci. Rprt. No<br>Src. Mean | Sci. Rprt. &<br>Trump Src.<br>Mean | Diff. | <i>p</i> -value |
|------------------------|----------------------------|------------------------------------|-------|-----------------|
| Scaled Effects Battery | 4.80                       | 4.89                               | -0.09 | 0.707           |
| Risk Scale             | 6.00                       | 6.17                               | -0.16 | 0.141           |
| Hoax                   | 2.02                       | 2.26                               | -0.24 | 0.221           |
| Observations           | 282                        |                                    |       |                 |

Note: The first column contains the Scientific Report No Source condition mean for each of the three dependent variables; The second column contains the mean for the Scientific Report & Trump Source condition; The third column contains the difference in means between the conditions, with the *p*-value for each test presented in fourth column.



#### Conspiracy No Src. & Sci. Rprt. vs Conspiracy with Trump Src. & Sci. Rprt.

|                        | Conspiracy No<br>Src. & Sci.<br>Rprt. Mean | Conspiracy<br>with Trump<br>Src. & Sci.<br>Rprt. Mean | Diff. | <i>p</i> -value |
|------------------------|--------------------------------------------|-------------------------------------------------------|-------|-----------------|
| Scaled Effects Battery | 4.86                                       | 4.78                                                  | 0.07  | 0.542           |
| Risk Scale             | 5.23                                       | 5.10                                                  | 0.13  | 0.238           |
| Hoax                   | 2.89                                       | 2.95                                                  | -0.05 | 0.685           |
| Observations           | 837                                        |                                                       |       |                 |

Note: The first column contains the Conspiracy No Src. & Sci. Rprt. condition mean for each of the three dependent variables; The second column contains the mean for the Conspiracy with Trump Src. & Sci. Rprt. condition; The third column contains the difference in means between the conditions, with the *p*-value for each test presented in fourth column.

#### Conspiracy No Src. & Sci. Rprt. vs Conspiracy with Trump Src. & Sci. Rprt. - Republicans

|                        | Conspiracy No<br>Src. & Sci.<br>Rprt. Mean | Conspiracy<br>with Trump<br>Src. & Sci.<br>Rprt. Mean | Diff. | <i>p</i> -value |
|------------------------|--------------------------------------------|-------------------------------------------------------|-------|-----------------|
| Scaled Effects Battery | 4.64                                       | 4.73                                                  | -0.09 | 0.594           |
| Risk Scale             | 4.26                                       | 4.27                                                  | -0.02 | 0.937           |
| Hoax                   | 3.87                                       | 3.85                                                  | 0.02  | 0.917           |
| Observations           | 285                                        |                                                       |       |                 |

Note: The first column contains the Conspiracy No Src. & Sci. Rprt. condition mean for each of the three dependent variables; The second column contains the mean for the Conspiracy with Trump Src. & Sci. Rprt. condition; The third column contains the difference in means between the conditions, with the *p*-value for each test presented in fourth column.

#### Conspiracy No Src. & Sci. Rprt. vs Conspiracy with Trump Src. & Sci. Rprt. - Independents

|                        | Conspiracy No<br>Src. & Sci.<br>Rprt. Mean | Conspiracy<br>with Trump<br>Src. & Sci.<br>Rprt. Mean | Diff. | <i>p</i> -value |
|------------------------|--------------------------------------------|-------------------------------------------------------|-------|-----------------|
| Scaled Effects Battery | 4.83                                       | 4.55                                                  | 0.28  | 0.190           |
| Risk Scale             | 5.45                                       | 5.03                                                  | 0.42  | 0.013           |
| Hoax                   | 2.70                                       | 2.98                                                  | -0.27 | 0.214           |
| Observations           | 261                                        |                                                       |       |                 |

Note: The first column contains the Conspiracy No Src. & Sci. Rprt. condition mean for each of the three dependent variables; The second column contains the mean for the Conspiracy with Trump Src. & Sci. Rprt. condition; The third column contains the difference in means between the conditions, with the *p*-value for each test presented in fourth column.

#### Conspiracy No Src. & Sci. Rprt. vs Conspiracy with Trump Src. & Sci. Rprt. - Democrats

|                        | Conspiracy No<br>Src. & Sci.<br>Rprt. Mean | Conspiracy<br>with Trump<br>Src. & Sci.<br>Rprt. Mean | Diff. | <i>p</i> -value |
|------------------------|--------------------------------------------|-------------------------------------------------------|-------|-----------------|
| Scaled Effects Battery | 5.08                                       | 5.06                                                  | 0.02  | 0.919           |
| Risk Scale             | 5.99                                       | 5.99                                                  | -0.00 | 0.990           |
| Hoax                   | 2.09                                       | 2.03                                                  | 0.06  | 0.740           |
| Observations           | 291                                        |                                                       |       |                 |

Note: The first column contains the Conspiracy No Src. & Sci. Rprt. condition mean for each of the three dependent variables; The second column contains the mean for the Conspiracy with Trump Src. & Sci. Rprt. condition; The third column contains the difference in means between the conditions, with the p-value for each test presented in fourth column.

## Survey Measures – Study 1

### Effect Scale

*Listed below are various effects that climate scientists predict will happen due to climate change. Rate the extent to which you believe climate change will have positive or negative effect in the US on ...*

*Increasing droughts*

*Increasing wildfires*

*Coastal flooding*

*Intensity of hurricanes*

*Freshwater availability*

*Agricultural production*

*Increasing heat waves*

*The U.S. economy*

- Definitely negative (7)
- Very likely negative (6)
- Likely negative (5)
- Neither positive nor negative (4)
- Likely positive (3)
- Very likely positive (2)
- Definitely positive (1)

**Risk Scale****Happening**

Do you think that climate change is happening?

- ☐ Definitely is NOT happening (1)
- ☐ Very likely is NOT happening (2)
- ☐ Probably is NOT happening (3)
- ☐ Not sure (4)
- ☐ Probably is happening (5)
- ☐ Very likely is happening (6)
- ☐ Definitely is happening (7)

**Faster**

To what extent do you disagree or agree with the following statement:

“Climate change is occurring faster now because of human activity.”

- ☐ Strongly disagree (1)
- ☐ Disagree (2)
- ☐ Somewhat disagree (3)
- ☐ Neither agree nor disagree (4)
- ☐ Somewhat agree (5)
- ☐ Agree (6)
- ☐ Strongly agree (7)

**Concern**

How concerned are you about the effects that climate change will have on you, your family, and your community?

- ☐ Extremely unconcerned (1)
- ☐ Very unconcerned (2)
- ☐ Somewhat unconcerned (3)
- ☐ Neither unconcerned nor concerned (4)
- ☐ Somewhat concerned (5)
- ☐ Very concerned (6)
- ☐ Extremely concerned (7)

**Hoax**

To what extent do you disagree or agree with the following statement?

“The idea that climate change is primarily due to human activities is a hoax or a conspiracy”

- ☐ Strongly disagree (1)
- ☐ Disagree (2)
- ☐ Somewhat disagree (3)
- ☐ Neither agree nor disagree (4)
- ☐ Somewhat agree (5)
- ☐ Agree (6)
- ☐ Strongly agree (7)

## Study Two Experimental Conditions

### *Control condition*

Next, we will ask you several questions about your opinions on various topics. Please read each question carefully.

### *Scientific report*

#### Carbon Capture Technology May Be A Silver Bullet to Stop Climate Change

For immediate release

Several recent scientific consensus reports find that advances in technology can help slow climate change. When coal, oil or gas is burned in a power plant to create electricity, the by-product is carbon dioxide that is released into the atmosphere as a greenhouse gas. With “carbon capture” technologies, carbon dioxide is sucked from the air right at the power plant. The technology then turns this carbon dioxide into liquid that can be safely stored, or re-used to create a low-carbon fuel that can power airplanes and trucks. Capturing the carbon dioxide this way before it gets into the atmosphere would reduce greenhouse gases and slow climate change. A growing consensus of scientists recommends adopting these carbon removal technologies. For example, a major report produced by more than 800 experts working together, estimated that a power plant using carbon capture and storage could reduce emissions into the atmosphere by 80 to 90 percent, thereby helping to slow climate change.

### *Scientific report endorsed by Vice President Gore*

#### Gore Argues Carbon Capture May Be A Silver Bullet to Stop Climate Change

For immediate release

Several recent scientific consensus reports find that advances in technology can help slow climate change. When coal, oil or gas is burned in a power plant to create electricity, the by-product is carbon dioxide that is released into the atmosphere as a greenhouse gas. With “carbon capture” technologies, carbon dioxide is sucked from the air right at the power plant. The technology then turns this carbon dioxide into liquid that can be safely stored, or re-used to create a low-carbon fuel that can power airplanes and trucks. Capturing the carbon dioxide this way before it gets into the atmosphere would reduce greenhouse gases and slow climate change. In response to the reports, former Vice President Al Gore acknowledged that a consensus of scientists recommends adopting these carbon removal technologies. For example, a major report produced by more than 800 experts working together, estimated that a power plant using carbon capture and storage could reduce emissions into the atmosphere by 80 to 90 percent.

### *Conspiracy frame*

#### Carbon Capture is Turning Out to Be Just Another Scam

For immediate release

According to several scientific “consensus” reports, a technology called “carbon capture” claims to suck carbon dioxide from the air, turn it into a liquid using chemicals, and store it underground. Capturing the carbon dioxide this way before it gets into the atmosphere would reduce greenhouse gases and slow climate change. In response to the reports, skeptics criticized carbon capture and storage as “nonsense” and “an extremely improbable solution.” Instead, they

say it diverts attention from the real problem which is the unbridled release of carbon dioxide as a by-product of the burning of fossil fuels. The companies producing these fossil fuels such as ExxonMobil, Chevron, BP, Royal Dutch Shell, and Saudi Aramco are secretly promoting this engineering solution because they could both turn carbon dioxide capture into a profitable business while continuing to benefit from the sale of increasing amounts of carbon fuels such as oil and coal. In fact, these climate-altering strategies are unproven, poorly understood, and based on the false hope that addressing climate change simply involves a technological “fix.”

### ***Conspiracy frame attributed to Vice President Gore***

#### **Gore Argues Carbon Capture Turning Out to Be Just Another Scam**

For immediate release

According to several scientific “consensus” reports, a technology called “carbon capture” claims to suck carbon dioxide from the air, turn it into a liquid using chemicals, and store it underground. Capturing the carbon dioxide this way before it gets into the atmosphere would reduce greenhouse gases and slow climate change. In response to the reports, former Vice President Al Gore criticized carbon capture and storage as “nonsense” and “an extremely improbable solution.” Instead, he noted that it diverts attention from the real problem which is the unbridled release of carbon dioxide as a by-product of the burning of fossil fuels. The companies producing these fossil fuels such as ExxonMobil, Chevron, BP, Royal Dutch Shell, and Saudi Aramco are secretly promoting this engineering solution because they could both turn carbon dioxide capture into a profitable business while continuing to benefit from the sale of increasing amounts of carbon fuels such as oil and coal. In fact, these climate-altering strategies are unproven, poorly understood, and based on the false hope that addressing climate change simply involves a technological “fix.”

### ***Combination of scientific report and conspiracy frame***

#### **Debated Technology May Be A Silver Bullet to Stop Climate Change**

For immediate release

Several recent scientific consensus reports find that advances in technology can help slow climate change. When coal, oil or gas is burned in a power plant to create electricity, the by-product is carbon dioxide that is released into the atmosphere as a greenhouse gas. With “carbon capture” technologies, carbon dioxide is sucked from the air right at the power plant. The technology then turns this carbon dioxide into liquid that can be safely stored, or re-used to create a low-carbon fuel that can power airplanes and trucks. Capturing the carbon dioxide this way before it gets into the atmosphere would reduce greenhouse gases and slow climate change. A growing consensus of scientists recommends adopting these carbon removal technologies. For example, a major report produced by more than 800 experts working together, estimated that a power plant using carbon capture and storage could reduce emissions into the atmosphere by 80 to 90 percent, thereby helping to slow climate change. In response to the reports, skeptics criticized carbon capture and storage as “nonsense” and “an extremely improbable solution.” Instead, they say it diverts attention from the real problem which is the unbridled release of carbon dioxide as a by-product of the burning of fossil fuels. The companies producing these fossil fuels such as ExxonMobil, Chevron, BP, Royal Dutch Shell, and Saudi Aramco are secretly promoting this engineering solution because they could both turn carbon dioxide capture into a profitable business while continuing to benefit from the sale of increasing amounts of

carbon fuels such as oil and coal. In fact, these climate-altering strategies are unproven, poorly understood, and based on the false hope that addressing climate change simply involves a technological “fix.”

***Combination of scientific report and conspiracy frame attributed to Vice President Gore***

**Debated Technology May Be A Silver Bullet to Stop Climate Change**

For immediate release

Several recent scientific consensus reports find that advances in technology can help slow climate change. When coal, oil or gas is burned in a power plant to create electricity, the by-product is carbon dioxide that is released into the atmosphere as a greenhouse gas. With “carbon capture” technologies, carbon dioxide is sucked from the air right at the power plant. The technology then turns this carbon dioxide into liquid that can be safely stored, or re-used to create a low-carbon fuel that can power airplanes and trucks. Capturing the carbon dioxide this way before it gets into the atmosphere would reduce greenhouse gases and slow climate change. A growing consensus of scientists recommends adopting these carbon removal technologies. For example, a major report produced by more than 800 experts working together, estimated that a power plant using carbon capture and storage could reduce emissions into the atmosphere by 80 to 90 percent, thereby helping to slow climate change. In response to the reports, former Vice President Al Gore criticized carbon capture and storage as “nonsense” and “an extremely improbable solution.” Instead, he noted that it diverts attention from the real problem which is the unbridled release of carbon dioxide as a by-product of the burning of fossil fuels. The companies producing these fossil fuels such as ExxonMobil, Chevron, BP, Royal Dutch Shell, and Saudi Aramco are secretly promoting this engineering solution because they could both turn carbon dioxide capture into a profitable business while continuing to benefit from the sale of increasing amounts of carbon fuels such as oil and coal. In fact, these climate-altering strategies are unproven, poorly understood, and based on the false hope that addressing climate change simply involves a technological “fix.”

## Demographics (Study 2)

**Table A5 – Sample Demographics**

| Variable              | Frequency (%) |
|-----------------------|---------------|
| Age                   |               |
| 18 – 24               | 248 (9.0%)    |
| 25 – 34               | 494 (18.0%)   |
| 35 – 44               | 445 (16.2%)   |
| 45 – 54               | 436 (15.9%)   |
| 55 – 64               | 524 (19.1%)   |
| 65 – 74               | 479 (17.4%)   |
| 75 – 84               | 113 (4.1%)    |
| 85 or older           | 6 (0.2%)      |
| Female                |               |
| Male                  | 1,265 (46.1%) |
| Female                | 1,480 (53.9%) |
| Race                  |               |
| White                 | 1,959 (71.4%) |
| African American      | 251 (9.1%)    |
| Asian American        | 235 (8.6%)    |
| Hispanic              | 247 (9.0%)    |
| Other                 | 53 (1.9%)     |
| Education             |               |
| Less than high school | 84 (3.1%)     |
| High school graduate  | 619 (22.6%)   |
| Some college          | 679 (24.7%)   |
| 2 year degree         | 335 (12.2%)   |
| 4 year degree         | 675 (24.6%)   |
| Professional degree   | 291 (10.6%)   |
| Doctorate             | 62 (2.3%)     |
| Income                |               |
| Less than \$10,000    | 192 (7.0%)    |
| \$10,000 - \$19,999   | 287 (10.5%)   |
| \$20,000 - \$29,999   | 371 (13.5%)   |
| \$30,000 - \$39,999   | 331 (12.1%)   |
| \$40,000 - \$49,999   | 272 (9.9%)    |
| \$50,000 - \$59,999   | 252 (9.2%)    |
| \$60,000 - \$69,999   | 181 (6.6%)    |
| \$70,000 - \$79,999   | 188 (6.8%)    |
| \$80,000 - \$89,999   | 115 (4.2%)    |
| \$90,000 - \$99,999   | 119 (4.3%)    |
| \$100,000 - \$149,999 | 277 (10.1%)   |
| More than \$150,000   | 160 (5.8%)    |
| Party ID              |               |
| Republican            | 910 (33.2%)   |
| Independent           | 891 (32.5%)   |
| Democrat              | 944 (34.4%)   |
| Total                 | N=2,745       |



## Main Effects Tables (Study 2)

**Table A6: Support Carbon Capture**

|                                    | All                | Rep                | Ind                | Dem                |
|------------------------------------|--------------------|--------------------|--------------------|--------------------|
| Conspiracy                         | -0.94***<br>(0.11) | -0.60***<br>(0.23) | -0.91***<br>(0.17) | -1.12***<br>(0.20) |
| Conspiracy Gore Source             | -0.95***<br>(0.11) | -0.41*<br>(0.23)   | -1.09***<br>(0.17) | -1.21***<br>(0.20) |
| Scientific Report                  | 0.66***<br>(0.11)  | 0.78***<br>(0.23)  | 0.72***<br>(0.17)  | 0.67***<br>(0.20)  |
| Scientific Report Gore Source      | 0.73***<br>(0.11)  | 0.82***<br>(0.23)  | 0.38**<br>(0.16)   | 1.05***<br>(0.20)  |
| Conspiracy & Scientific Report     | 0.26**<br>(0.11)   | 0.73***<br>(0.23)  | 0.06<br>(0.16)     | 0.12<br>(0.21)     |
| Conspiracy Gore Src. & Sci. Report | 0.01<br>(0.11)     | 0.45*<br>(0.23)    | -0.01<br>(0.17)    | -0.25<br>(0.21)    |
| Constant (Control Group)           | 4.53***<br>(0.08)  | 4.16***<br>(0.18)  | 4.61***<br>(0.10)  | 4.66***<br>(0.15)  |
| Observations                       | 2745               | 910                | 891                | 944                |
| <i>AIC</i>                         | 10298.8            | 3544.3             | 3169.2             | 3549.2             |
| <i>BIC</i>                         | 10340.2            | 3578.0             | 3202.8             | 3583.2             |

Note: Cell entries are OLS coefficients, with standard errors in parentheses below.

\* p<0.10, \*\* p<0.05, \*\*\* p<0.01

**Table A7: Invest in Carbon Capture**

|                                    | All                | Rep               | Ind                | Dem                |
|------------------------------------|--------------------|-------------------|--------------------|--------------------|
| Conspiracy                         | -0.89***<br>(0.12) | -0.41*<br>(0.23)  | -0.84***<br>(0.18) | -1.45***<br>(0.21) |
| Conspiracy Gore Source             | -0.77***<br>(0.12) | -0.41*<br>(0.23)  | -0.62***<br>(0.18) | -1.29***<br>(0.21) |
| Scientific Report                  | 0.45***<br>(0.12)  | 0.51**<br>(0.23)  | 0.56***<br>(0.19)  | 0.29<br>(0.21)     |
| Scientific Report Gore Source      | 0.36***<br>(0.11)  | 0.40*<br>(0.23)   | 0.27<br>(0.18)     | 0.33<br>(0.20)     |
| Conspiracy & Scientific Report     | 0.04<br>(0.12)     | 0.52**<br>(0.23)  | 0.07<br>(0.17)     | -0.48**<br>(0.21)  |
| Conspiracy Gore Src. & Sci. Report | -0.07<br>(0.12)    | 0.39*<br>(0.23)   | -0.12<br>(0.18)    | -0.52**<br>(0.21)  |
| Constant (Control Group)           | 4.60***<br>(0.08)  | 4.16***<br>(0.18) | 4.50***<br>(0.11)  | 5.15***<br>(0.16)  |
| Observations                       | 2745               | 910               | 891                | 944                |
| <i>AIC</i>                         | 10486.9            | 3548.6            | 3312.7             | 3582.0             |
| <i>BIC</i>                         | 10528.3            | 3582.3            | 3346.3             | 3616.0             |

Note: Cell entries are OLS coefficients, with standard errors in parentheses below.

\* p<0.10, \*\* p<0.05, \*\*\* p<0.01

**Table A8: Carbon Capture is a Deception**

|                                    | All                | Rep               | Ind               | Dem                |
|------------------------------------|--------------------|-------------------|-------------------|--------------------|
| Conspiracy                         | 0.30***<br>(0.11)  | 0.08<br>(0.21)    | 0.28*<br>(0.16)   | 0.53***<br>(0.20)  |
| Conspiracy Gore Source             | 0.46***<br>(0.11)  | 0.26<br>(0.21)    | 0.48***<br>(0.17) | 0.66***<br>(0.20)  |
| Scientific Report                  | -0.38***<br>(0.11) | -0.20<br>(0.21)   | -0.26<br>(0.17)   | -0.64***<br>(0.20) |
| Scientific Report Gore Source      | -0.31***<br>(0.11) | -0.17<br>(0.21)   | -0.36**<br>(0.16) | -0.39**<br>(0.19)  |
| Conspiracy & Scientific Report     | -0.03<br>(0.11)    | -0.07<br>(0.21)   | 0.01<br>(0.16)    | -0.01<br>(0.20)    |
| Conspiracy Gore Src. & Sci. Report | -0.02<br>(0.11)    | -0.31<br>(0.21)   | 0.03<br>(0.16)    | 0.24<br>(0.20)     |
| Constant (Control Group)           | 4.04***<br>(0.07)  | 4.09***<br>(0.16) | 4.06***<br>(0.10) | 3.95***<br>(0.15)  |
| Observations                       | 2745               | 910               | 891               | 944                |
| <i>AIC</i>                         | 10011.8            | 3369.4            | 3138.0            | 3494.8             |
| <i>BIC</i>                         | 10053.2            | 3403.1            | 3171.6            | 3528.8             |

Note: Cell entries are OLS coefficients, with standard errors in parentheses below.

\* p<0.10, \*\* p<0.05, \*\*\* p<0.01

## Appendix A9 – Tests of Source Effects

### Conspiracy No Source vs Conspiracy With Gore Source

|                                | Consp. No Src.<br>Mean | Consp. & Gore<br>Src. Mean | Diff. | p-value |
|--------------------------------|------------------------|----------------------------|-------|---------|
| Support Carbon Capture         | 3.59                   | 3.57                       | 0.02  | 0.876   |
| Invest in Carbon Capture       | 3.71                   | 3.83                       | -0.12 | 0.328   |
| Carbon Capture is<br>Deception | 4.33                   | 4.50                       | -0.16 | 0.136   |
| Observations                   | 769                    |                            |       |         |

Note: The first column contains the Conspiracy No Source condition mean for each of the three dependent variables; The second column contains the mean for the Conspiracy & Gore Source condition; The third column contains the difference in means between the conditions, with the p-value for each test presented in fourth column.

### Conspiracy No Source vs Conspiracy With Gore Source - Republicans

|                                | Consp. No Src.<br>Mean | Consp. & Gore<br>Src. Mean | Diff. | p-value |
|--------------------------------|------------------------|----------------------------|-------|---------|
| Support Carbon Capture         | 3.56                   | 3.75                       | -0.19 | 0.354   |
| Invest in Carbon Capture       | 3.75                   | 3.75                       | -0.00 | 0.993   |
| Carbon Capture is<br>Deception | 4.17                   | 4.35                       | -0.17 | 0.353   |
| Observations                   | 271                    |                            |       |         |

Note: The first column contains the Conspiracy No Source condition mean for each of the three dependent variables; The second column contains the mean for the Conspiracy & Gore Source condition; The third column contains the difference in means between the conditions, with the p-value for each test presented in fourth column.

### Conspiracy No Source vs Conspiracy With Gore Source - Independents

|                                | Consp. No Src.<br>Mean | Consp. & Gore<br>Src. Mean | Diff. | p-value |
|--------------------------------|------------------------|----------------------------|-------|---------|
| Support Carbon Capture         | 3.70                   | 3.52                       | 0.18  | 0.351   |
| Invest in Carbon Capture       | 3.66                   | 3.88                       | -0.22 | 0.304   |
| Carbon Capture is<br>Deception | 4.33                   | 4.54                       | -0.20 | 0.299   |
| Observations                   | 221                    |                            |       |         |

Note: The first column contains the Conspiracy No Source condition mean for each of the three dependent variables; The second column contains the mean for the Conspiracy & Gore Source condition; The third column contains the difference in means between the conditions, with the p-value for each test presented in fourth column.

### Conspiracy No Source vs Conspiracy With Gore Source - Democrats

|                                | Consp. No Src.<br>Mean | Consp. & Gore<br>Src. Mean | Diff. | p-value |
|--------------------------------|------------------------|----------------------------|-------|---------|
| Support Carbon Capture         | 3.54                   | 3.45                       | 0.09  | 0.642   |
| Invest in Carbon Capture       | 3.70                   | 3.86                       | -0.15 | 0.475   |
| Carbon Capture is<br>Deception | 4.49                   | 4.61                       | -0.13 | 0.500   |
| Observations                   | 277                    |                            |       |         |

Note: The first column contains the Conspiracy No Source condition mean for each of the three dependent variables; The second column contains the mean for the Conspiracy & Gore Source condition; The third column contains the difference in means between the conditions, with the p-value for each test presented in fourth column.

#### Sci. Rprt. No Source vs Sci. Rprt. With Gore Source

|                                | Sci. Rprt. No<br>Src. Mean | Sci. Rprt. &<br>Gore Src. Mean | Diff. | <i>p</i> -value |
|--------------------------------|----------------------------|--------------------------------|-------|-----------------|
| Support Carbon Capture         | 5.19                       | 5.26                           | -0.07 | 0.560           |
| Invest in Carbon Capture       | 5.05                       | 4.96                           | 0.09  | 0.439           |
| Carbon Capture is<br>Deception | 3.65                       | 3.72                           | -0.07 | 0.528           |
| Observations                   | 801                        |                                |       |                 |

Note: The first column contains the Scientific Report No Source condition mean for each of the three dependent variables; The second column contains the mean for the Scientific Report & Gore Source condition; The third column contains the difference in means between the conditions, with the *p*-value for each test presented in fourth column.

#### Sci. Rprt. No Source vs Sci. Rprt. With Gore Source - Republicans

|                                | Sci. Rprt. No<br>Src. Mean | Sci. Rprt. &<br>Gore Src. Mean | Diff. | <i>p</i> -value |
|--------------------------------|----------------------------|--------------------------------|-------|-----------------|
| Support Carbon Capture         | 4.94                       | 4.99                           | -0.04 | 0.847           |
| Invest in Carbon Capture       | 4.67                       | 4.56                           | 0.11  | 0.594           |
| Carbon Capture is<br>Deception | 3.89                       | 3.92                           | -0.03 | 0.867           |
| Observations                   | 284                        |                                |       |                 |

Note: The first column contains the Scientific Report No Source condition mean for each of the three dependent variables; The second column contains the mean for the Scientific Report & Gore Source condition; The third column contains the difference in means between the conditions, with the *p*-value for each test presented in fourth column.

#### Sci. Rprt. No Source vs Sci. Rprt. With Gore Source - Independents

|                                | Sci. Rprt. No<br>Src. Mean | Sci. Rprt. &<br>Gore Src. Mean | Diff. | <i>p</i> -value |
|--------------------------------|----------------------------|--------------------------------|-------|-----------------|
| Support Carbon Capture         | 5.33                       | 4.99                           | 0.34  | 0.106           |
| Invest in Carbon Capture       | 5.06                       | 4.77                           | 0.29  | 0.173           |
| Carbon Capture is<br>Deception | 3.80                       | 3.69                           | 0.10  | 0.602           |
| Observations                   | 224                        |                                |       |                 |

Note: The first column contains the Scientific Report No Source condition mean for each of the three dependent variables; The second column contains the mean for the Scientific Report & Gore Source condition; The third column contains the difference in means between the conditions, with the *p*-value for each test presented in fourth column.

#### Sci. Rprt. No Source vs Sci. Rprt. With Gore Source - Democrats

|                                | Sci. Rprt. No<br>Src. Mean | Sci. Rprt. &<br>Gore Src. Mean | Diff. | <i>p</i> -value |
|--------------------------------|----------------------------|--------------------------------|-------|-----------------|
| Support Carbon Capture         | 5.33                       | 5.72                           | -0.38 | 0.035           |
| Invest in Carbon Capture       | 5.44                       | 5.48                           | -0.05 | 0.794           |
| Carbon Capture is<br>Deception | 3.31                       | 3.56                           | -0.25 | 0.164           |
| Observations                   | 293                        |                                |       |                 |

Note: The first column contains the Scientific Report No Source condition mean for each of the three dependent variables; The second column contains the mean for the Scientific Report & Gore Source condition; The third column contains the difference in means between the conditions, with the *p*-value for each test presented in fourth column.

#### Conspiracy No Src. & Sci. Rprt. vs Conspiracy with Gore Src. & Sci. Rprt.

|                                | Conspiracy No<br>Src. & Sci.<br>Rprt. Mean | Conspiracy<br>with Gore Src.<br>& Sci. Rprt.<br>Mean | Diff. | <i>p</i> -value |
|--------------------------------|--------------------------------------------|------------------------------------------------------|-------|-----------------|
| Support Carbon Capture         | 4.78                                       | 4.54                                                 | 0.24  | 0.027           |
| Invest in Carbon Capture       | 4.64                                       | 4.53                                                 | 0.11  | 0.329           |
| Carbon Capture is<br>Deception | 4.01                                       | 4.02                                                 | -0.01 | 0.936           |
| Observations                   | 773                                        |                                                      |       |                 |

Note: The first column contains the Conspiracy No Src. & Sci. Rprt. condition mean for each of the three dependent variables; The second column contains the mean for the Conspiracy with Gore Src. & Sci. Rprt. condition; The third column contains the difference in means between the conditions, with the *p*-value for each test presented in fourth column.

#### Conspiracy No Src. & Sci. Rprt. vs Conspiracy with Gore Src. & Sci. Rprt. - Republicans

|                                | Conspiracy No<br>Src. & Sci.<br>Rprt. Mean | Conspiracy<br>with Gore Src.<br>& Sci. Rprt.<br>Mean | Diff. | <i>p</i> -value |
|--------------------------------|--------------------------------------------|------------------------------------------------------|-------|-----------------|
| Support Carbon Capture         | 4.89                                       | 4.61                                                 | 0.28  | 0.167           |
| Invest in Carbon Capture       | 4.68                                       | 4.56                                                 | 0.12  | 0.562           |
| Carbon Capture is<br>Deception | 4.02                                       | 3.79                                                 | 0.24  | 0.199           |
| Observations                   | 268                                        |                                                      |       |                 |

Note: The first column contains the Conspiracy No Src. & Sci. Rprt. condition mean for each of the three dependent variables; The second column contains the mean for the Conspiracy with Gore Src. & Sci. Rprt. condition; The third column contains the difference in means between the conditions, with the *p*-value for each test presented in fourth column.

#### Conspiracy No Src. & Sci. Rprt. vs Conspiracy with Gore Src. & Sci. Rprt. - Independents

|                                | Conspiracy No<br>Src. & Sci.<br>Rprt. Mean | Conspiracy<br>with Gore Src.<br>& Sci. Rprt.<br>Mean | Diff. | <i>p</i> -value |
|--------------------------------|--------------------------------------------|------------------------------------------------------|-------|-----------------|
| Support Carbon Capture         | 4.67                                       | 4.60                                                 | 0.07  | 0.680           |
| Invest in Carbon Capture       | 4.57                                       | 4.38                                                 | 0.19  | 0.320           |
| Carbon Capture is<br>Deception | 4.06                                       | 4.09                                                 | -0.03 | 0.872           |
| Observations                   | 237                                        |                                                      |       |                 |

Note: The first column contains the Conspiracy No Src. & Sci. Rprt. condition mean for each of the three dependent variables; The second column contains the mean for the Conspiracy with Gore Src. & Sci. Rprt. condition; The third column contains the difference in means between the conditions, with the *p*-value for each test presented in fourth column.

#### Conspiracy No Src. & Sci. Rprt. vs Conspiracy with Gore Src. & Sci. Rprt. - Democrats

|                        | Conspiracy No<br>Src. & Sci.<br>Rprt. Mean | Conspiracy<br>with Gore Src.<br>& Sci. Rprt.<br>Mean | Diff. | <i>p</i> -value |
|------------------------|--------------------------------------------|------------------------------------------------------|-------|-----------------|
| Support Carbon Capture | 4.78                                       | 4.41                                                 | 0.37  | 0.061           |

|                          |      |      |       |       |
|--------------------------|------|------|-------|-------|
| Invest in Carbon Capture | 4.67 | 4.63 | 0.04  | 0.817 |
| Carbon Capture is        | 3.95 | 4.19 | -0.25 | 0.174 |
| Deception                |      |      |       |       |
| Observations             | 268  |      |       |       |

Note: The first column contains the Conspiracy No Src. & Sci. Rprt. condition mean for each of the three dependent variables; The second column contains the mean for the Conspiracy with Gore Src. & Sci. Rprt. condition; The third column contains the difference in means between the conditions, with the p-value for each test presented in fourth column.

## **Measures (Study 2)**

### **Support Carbon Capture**

Do you oppose or support using “carbon capture” technologies as a way to fight climate change?

- ☐ Strongly oppose (1)
- ☐ Moderately oppose (2)
- ☐ Slightly oppose (3)
- ☐ Neither support nor oppose (4)
- ☐ Slightly support (5)
- ☐ Moderately support (6)
- ☐ Strongly support (7)

### **Invest**

Do you believe the United States’ government should decrease or increase investments into “carbon capture” technologies as a way to slow the effects expected to occur due to climate change?

- ☐ Decrease a great deal (1)
- ☐ Decrease a moderate amount (2)
- ☐ Decrease a little (3)
- ☐ Neither increase nor decrease (4)
- ☐ Increase a little (5)
- ☐ Increase a moderate amount (6)
- ☐ Increase a great deal (7)

### **Deception**

To what extent do you disagree or agree with the following statement?

“The idea that carbon capture technologies can slow or reverse the effects of climate change is a deception promoted by carbon producing industries.”

- ☐ Strongly disagree (1)
- ☐ Disagree (2)
- ☐ Somewhat disagree (3)
- ☐ Neither agree nor disagree (4)
- ☐ Somewhat agree (5)
- ☐ Agree (6)
- ☐ Strongly agree (7)
